# Supplementary material
Source: PubMed Central journal article supplement (PMC4394277)
Supplement: pnas.201417939SI.pdf [file pnas.201417939SI.pdf]

# Supporting Information

Pais et al. 10.1073/pnas.1417939112

## SI Materials and Methods

**Expression and Purification of NgTET1.** A pTXB1 construct of the N-terminal 6× histidine-tagged full-length NgTET1 was expressed and purified as described previously, using a HiTrap Heparin HP column followed by a HisTrap HP column (GE-Healthcare) (1). The isolated protein with >95% homogeneity, as determined by Coomassie-stained PAGE, was stored at  $-20^{\circ}\text{C}$  in 20 mM Tris pH 7.5, 300 mM sodium chloride (NaCl), and 50% (vol/vol) glycerol. Site-directed mutagenesis was performed using the Q5 Site-Directed Mutagenesis Kit (New England Biolabs), and all variant proteins were expressed and purified using the same protocol as the WT protein.

**Preparation of DNA Substrates.** Single-stranded (ss) oligonucleotides (oligos) were synthesized by IDT, and duplex oligos were prepared by annealing equimolar amounts of complementary ss-oligos at  $95^{\circ}\text{C}$  for 3 min followed by slow cooling at room temperature for 1 h. Plasmid DNA substrates used in this study are either commercially available from New England Biolabs or isolated from *Escherichia coli* cells, which were either *dcm*<sup>+</sup> for C<sup>5m</sup>CWGG-methylated (where W = A or T) plasmids, or *dcm*<sup>-</sup> for plasmids harboring a methyltransferase gene to achieve in vivo methylation at the desired target sites on the plasmid. One plasmid substrate, pXba DNA, was in vitro methylated using M.HaeIII methyltransferase (New England Biolabs) following the recommended protocol. Mammalian gDNA and *Helicobacter pylori* 26695 gDNA (*H. pylori* gDNA) are available from New England Biolabs and ATCC, respectively. Other gDNA substrates used were isolated from *Escherichia coli* expressing different methyltransferase genes following standard procedures. All gDNA was sheared using a Covaris S2 Focused-ultrasonicator, according to the manufacturer's guidelines.

**NgTET1 Activity Assay.** For all NgTET1 reactions, substrate DNA was added to buffer containing 50 mM NaCl, 1 mM DTT, 2 mM ascorbic acid, 1 mM  $\alpha$ -ketoglutarate ( $\alpha$ KG), and 100  $\mu\text{M}$  ferrous sulfate ( $\text{FeSO}_4$ ). Unless otherwise noted, 50 mM Bis-Tris buffer at pH 6.0 was used; other buffers used were 50 mM Tris or 50 mM 3-(*N*-morpholino)propanesulfonic acid (Mops buffer) at the indicated pH values. Reactions had a total volume of 50  $\mu\text{L}$  and were incubated for 1 h at  $34^{\circ}\text{C}$ , unless otherwise noted, and subsequently incubated with 0.8 units (U) proteinase K (New England Biolabs) for 1 h at  $50^{\circ}\text{C}$ . For time courses, reactions were incubated at  $34^{\circ}\text{C}$  for the specified time, and then quenched by heating at  $95^{\circ}\text{C}$  for 3 min. The samples were then placed on ice for 5 min, followed by digestion with proteinase K. DNA was purified using either a QIAquick Nucleotide Removal Kit (Qiagen) or a DNA Clean & Concentrator Kit (Zymo Research), and was analyzed for oxidized <sup>5m</sup>C modifications using either a restriction enzyme (RE)-based assay or a LC-MS-based assay (see below).

Activity assays with the C-terminal catalytic domain of mouse TET1 (mTET1CD) were performed according to the manufacturer's instructions (WiseGene). Reaction time points were quenched as described for NgTET1 time courses. All other DNA treatment steps were as described for NgTET1 reactions.

**RE-Based NgTET1 Activity Assay.** Purified DNA (300 ng) from each NgTET1 reaction, performed in Tris buffer (pH 6.6) for 30 min, was digested with 20 U of BamHI (New England Biolabs) (to linearize the plasmid) and 50 U of MspI (New England Biolabs) in New England Biolabs CutSmart buffer (pH 7.9) for 1 h at  $37^{\circ}\text{C}$  in 20  $\mu\text{L}$  total volume. The reaction products were resolved on a 1.8% agarose gel.

**LC-MS-Based NgTET1 Activity Assay.** Each DNA sample from the NgTET1 reaction (see above) was digested to nucleosides, as described previously (1). LC-MS analysis was performed as indicated either on an Agilent 1200 series [G1316A UV Detector, 6120 Mass Detector, Agilent equipped with a Waters Atlantis T3 column (4.6 × 150 mm, 3  $\mu\text{m}$ ; Waters) with in-line filter and guard] or on a 6490 Triple Quad LC-MS [1290 Infinity UV detector, 6490 Triple Quad Mass detector (Agilent), equipped with an XSelect HSS T3 column (2.1 × 100mm, 2.5  $\mu\text{m}$ ; Waters)]. The relative percentages of the reaction species were calculated according to the standard curves generated from intensity peak integration.

**SMRT Sequencing.** DNA was sheared to 2-kb fragments by a Covaris system, concentrated using the DNA Clean & Concentrator Kit (Zymo Research), and suspended in milliQ H<sub>2</sub>O. Fragments were then treated with NgTET1 (or buffer only for the negative control), using 20- $\mu\text{L}$  total volume containing 1  $\mu\text{g}$  DNA and 10  $\mu\text{M}$  NgTET1 (when present) in Mops buffer, pH 6.75. Reactions were incubated for 1 h at  $34^{\circ}\text{C}$ , followed by the addition of 18  $\mu\text{L}$  of 50 mM Tris, pH 8.0, and 0.8 U proteinase K for 1 h at  $50^{\circ}\text{C}$ . Samples treated with T4- $\beta$ -glucosyltransferase (T4- $\beta$ GT; New England Biolabs) were first subjected to chemical reduction with 100 mM sodium borohydride ( $\text{NaBH}_4$ ) following the proteinase K digestion step, and then 500 U/mL T4- $\beta$ GT in NEBuffer 4 (50 mM potassium acetate, 20 mM Tris-acetate, 10 mM magnesium acetate, 1 mM DTT, pH 7.9) containing 50  $\mu\text{M}$  uridine diphosphate glucose. These reactions were incubated for 1 h at  $37^{\circ}\text{C}$ . All DNA fragments were then purified using the DNA Clean & Concentrator Kit and used to prepare SMRTbell template libraries, following the Procedure and Checklist for 2-kb Template Preparation and Sequencing from Pacific Biosciences, starting with an additional DNA repair step before the end repair step.

**Analysis of SMRT Sequencing Data.** Base modification detection and motif analysis was performed using the "RS\_Modification\_and\_Motif\_Analysis.1" protocol included in the SMRT Portal v2.2.0. The GenBank/RefSeq entry NC\_000915.1 was used as a reference for *H. pylori* 26695, and the samples treated without NgTET1 were entered as control jobs in the SMRT portal to allow for comparative sequencing and detection of <sup>5m</sup>C modifications. A kinetic score threshold of quality value 30 was used for all samples. One or eight SMRT cells (each taking two 60-min movies) were used to sequence pRS(M.HpaII) plasmid DNA or *H. pylori* 26695 gDNA, respectively, yielding an average reference coverage of 5110 or 150. IPD ratio values were extracted from the raw modifications.csv files and the detected fractions were extracted from the modifications.gff files.

1. Hashimoto H, et al. (2014) Structure of a *Naegleria* Tet-like dioxygenase in complex with 5-methylcytosine DNA. *Nature* 506(7488):391–395.

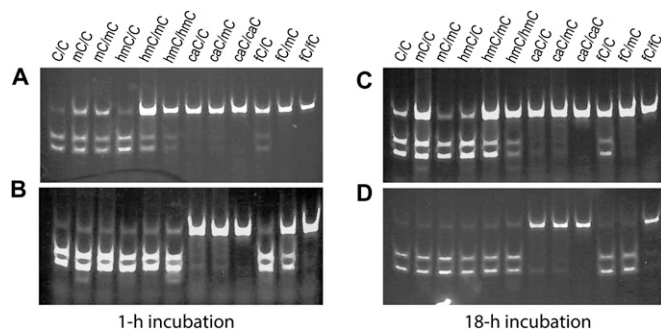

**Fig. S1.** MspI activity on oligo substrates containing  $5^m\text{C}$ ,  $5^{\text{hm}}\text{C}$ ,  $5^f\text{C}$ , and  $5^{\text{ca}}\text{C}$ . Fluorescently labeled 45-bp ss-oligos containing either unmodified (CCGG) or  $5^m\text{C}$ -modified ( $\text{C}^m\text{CGG}$ ) sequences were made by oligo synthesis and were annealed with the respective counterparts to generate ds-oligos with the respective MspI recognition site CCGG/CCGG (referred to as C/C),  $\text{C}^m\text{CGG}/\text{CCGG}$  (referred to as mC/C),  $\text{C}^m\text{CGG}/\text{C}^m\text{CGG}$  (referred to as mC/mC) (Table S4, oligos 1–3). The fluorescently labeled ds-oligos containing a single  $5^m\text{C}$ ,  $5^f\text{C}$  or  $5^{\text{ca}}\text{C}$  residue either on one or both strands were synthesized following a previously described protocol (1). The resulting ds-oligos (Table S4, oligos 4–12) contained modified MspI sites as follows:  $\text{C}^m\text{CGG}/\text{CCGG}$  (referred to as hmC/C);  $\text{C}^m\text{CGG}/\text{C}^m\text{CGG}$  (referred to as hmC/hmC);  $\text{C}^{\text{ca}}\text{CGG}/\text{CCGG}$  (referred to as caC/C);  $\text{C}^{\text{ca}}\text{CGG}/\text{C}^{\text{ca}}\text{CGG}$  (referred to as caC/caC);  $\text{C}^f\text{CGG}/\text{CCGG}$  (referred to as fC/C);  $\text{C}^f\text{CGG}/\text{C}^f\text{CGG}$  (referred to as fC/fC). Each ds-oligo substrate (10 pmol/10  $\mu\text{L}$  NEBuffer 4) was cleaved with either 2 U (A and C) or 20 U (B and D) of MspI restriction endonuclease. The reactions were carried out at 37  $^\circ\text{C}$  for either 1 h (A and B) or 18 h (C and D). Reaction products were separated by electrophoresis on 10–20% polyacrylamide gels and visualized under UV light.

1. Kinney SM, et al. (2011) Tissue-specific distribution and dynamic changes of 5-hydroxymethylcytosine in mammalian genomes. *J Biol Chem* 286(28):24685–24693.

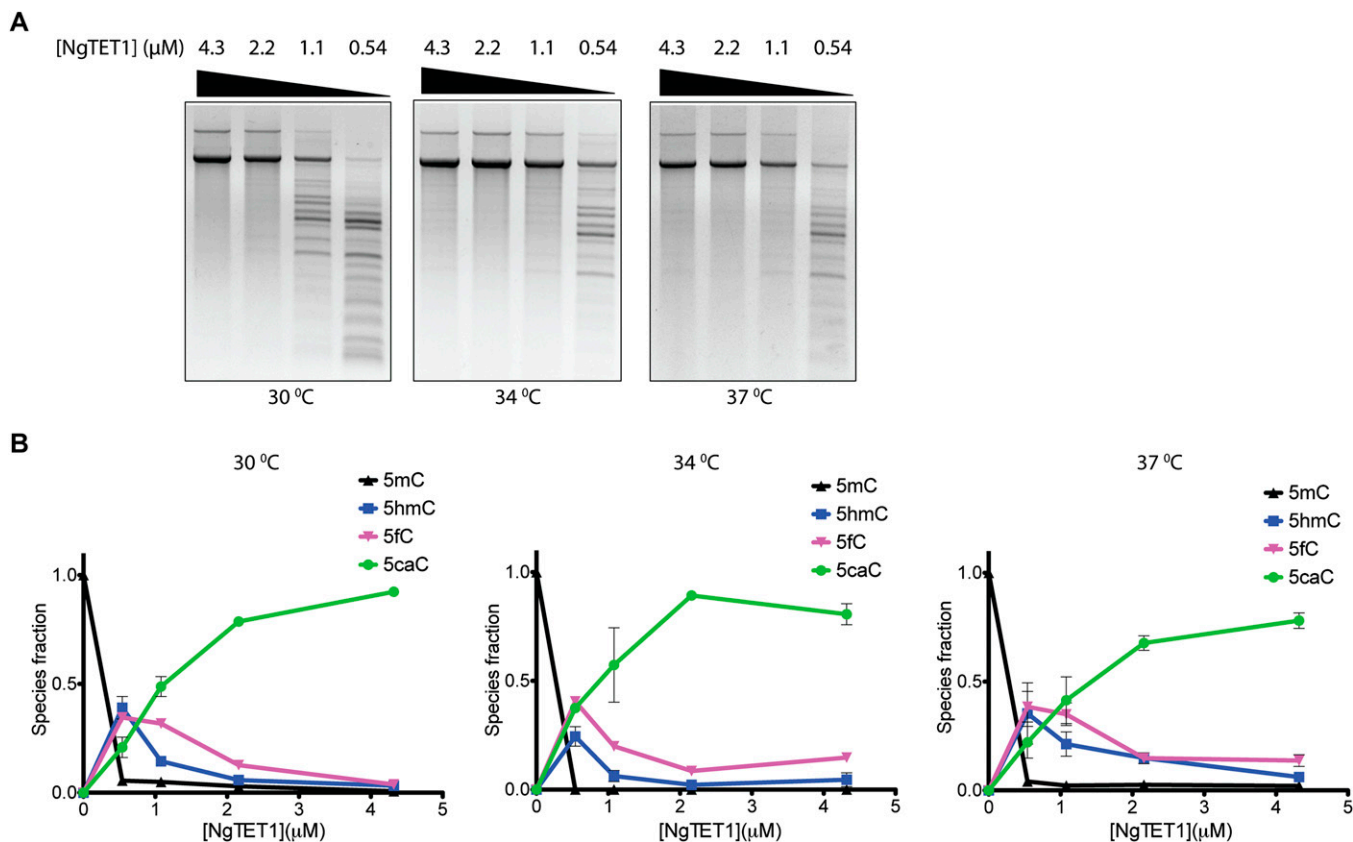

**Fig. S2.** Temperature dependence of NgTET1. (A) MspI-based assay to measure NgTET1 reaction efficiency at 30  $^\circ\text{C}$ , 34  $^\circ\text{C}$ , or 37  $^\circ\text{C}$ . NgTET1 reactions were carried out using 1  $\mu\text{g}$  of pRS(M.HpaII) plasmid DNA at 34  $^\circ\text{C}$  for 30 min in 50 mM Tris, pH 6.6, 50 mM NaCl, 1 mM DTT, 2 mM ascorbic acid, 1 mM  $\alpha\text{KG}$ , and 100  $\mu\text{M}$   $\text{FeSO}_4$  in 50- $\mu\text{L}$  total volume. DNA was purified and 300 ng were subjected to digestion with 20 U of BamHI (to linearize the plasmid) and 50 U of MspI in New England Biolabs CutSmart buffer (pH 7.9) for 1 h at 37  $^\circ\text{C}$  in 20- $\mu\text{L}$  total volume. (B) Quantification of NgTET1 reaction products at different temperatures using the LC-MS-based assay, at varying concentrations of enzyme. NgTET1 reactions were conducted as described in A for the pRS(M.HpaII) plasmid. Purified DNA was digested to nucleosides and analyzed on an Agilent 1200 series (G1316A UV Detector, 6120 Mass Detector) with a Waters Atlantis T3 column (4.6  $\times$  150 mm, 3  $\mu\text{M}$ ; Waters) with in-line filter and guard.

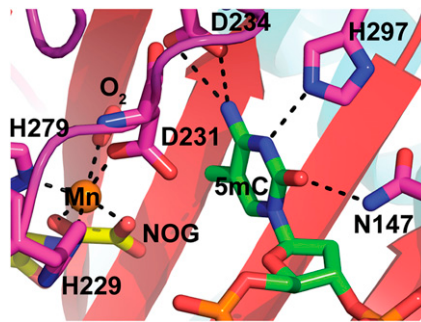

Fig. S3. View of active site and interactions with  $5^m\text{C}$  in the crystal structure of NgTET1 in complex with DNA (PDB ID code 4LT5) (1).

1. Hashimoto H, et al. (2014) Structure of a Naegleria Tet-like dioxygenase in complex with 5-methylcytosine DNA. *Nature* 506(7488):391–395.

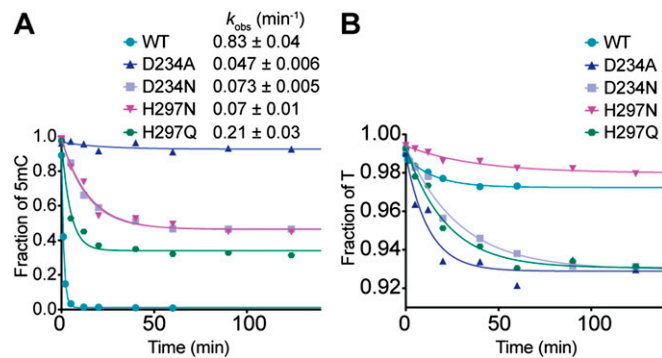

Fig. S4. Kinetic traces plotting the decay of (A)  $5^m\text{C}$  or (B) T for WT compared with variants, using  $4 \mu\text{M}$  NgTET1 WT or variant proteins with  $2 \mu\text{M}$  oligo  $\text{C}^{5m}\text{CGG}$ . Reaction species were detected and quantified by LC-MS (Agilent 1200). The data are fit to a single exponential and the observed rate constants with SEM are provided.

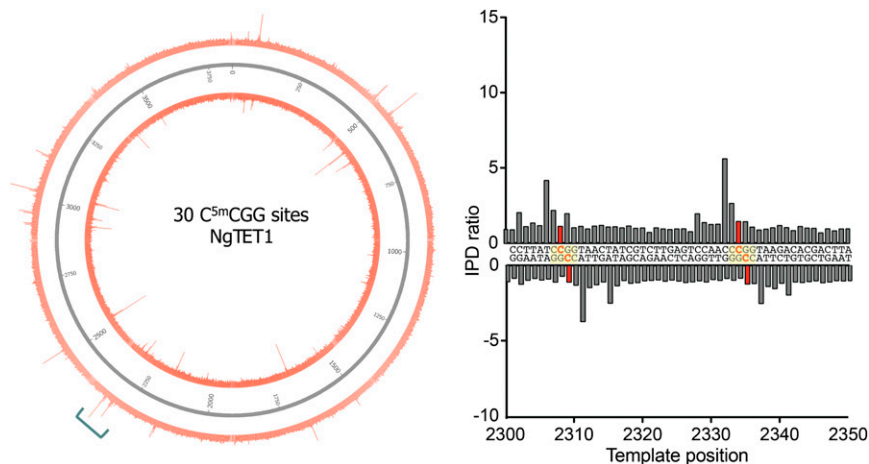

Fig. S5. Circos plot showing the plasmid-wide view of IPD ratios for a  $\text{C}^{5m}\text{CGG}$  methylated plasmid, pRS(M.HpaII), treated with NgTET1 and subjected to SMRT sequencing. The outer and inner circles denote the forward and reverse strands, respectively, and the brackets indicate the 50-bp segment shown at base resolution in the graph on the right, where the methylation motifs are highlighted in yellow and the methylated position is shown in red.



**Table S1. List of oligo substrate names and sequences used in this study**

| Name                        | Figure                                     | Oligonucleotide sequence                                                                                                                                                                                                                                                                                                                                                                                                                                                                                                                                                                                  |
|-----------------------------|--------------------------------------------|-----------------------------------------------------------------------------------------------------------------------------------------------------------------------------------------------------------------------------------------------------------------------------------------------------------------------------------------------------------------------------------------------------------------------------------------------------------------------------------------------------------------------------------------------------------------------------------------------------------|
| 24X                         | Fig. 1C                                    | 5'-TACTCTATACTCTACTCATATTACA <sup>5m</sup> CG <sup>5m</sup> CG <sup>5m</sup> CGATAT <sup>5m</sup> CGTTAA <sup>5m</sup> CGATAATT <sup>5m</sup> CG-<br>5 <sup>m</sup> CG <sup>5m</sup> CGATTA <sup>5m</sup> CGAT <sup>5m</sup> CGATAA <sup>5m</sup> CG <sup>5m</sup> CGTTAATATGAGATATGAGATGTGTATG-3'<br>3'-ATGAGATATGAGATGAGTAGTAAATGTG <sup>5m</sup> CG <sup>5m</sup> CG <sup>5m</sup> CTATAG <sup>5m</sup> CAATTG <sup>5m</sup> CTATTAAG <sup>5m</sup> CG-<br>5 <sup>m</sup> CG <sup>5m</sup> CTAATG <sup>5m</sup> CTAG <sup>5m</sup> CTATG <sup>5m</sup> CG <sup>5m</sup> CAATTATACTCTATACTCTACACATAC-5' |
| C <sup>5m</sup> CGG         | Fig. 1 D and E,<br>Fig. 2 A and D, Fig. S4 | 5'-CGGCGTTTCCGGGTTCATAGGCTCCGCC <sup>5m</sup> CGGACTCTGATGACCAGGGCATCACA-3'<br>3'-GCCGCAAAGGCCAAGGTATCCGAGGCGGG <sup>5m</sup> CCTGAGACTACTGGTCCCCTAGTGT-5'                                                                                                                                                                                                                                                                                                                                                                                                                                                |
| C <sup>5m</sup> CGG(hemi_1) | Figs. 1D and 3E                            | 5'-CGGCGTTTCCGGGTTCATAGGCTCCGCC <sup>5m</sup> CGGACTCTGATGACCAGGGCATCACA-3'<br>3'-GCCGCAAAGGCCAAGGTATCCGAGGCGGGCCTGAGACTACTGGTCCCCTAGTGT-5'                                                                                                                                                                                                                                                                                                                                                                                                                                                               |
| C <sup>5m</sup> CGG(hemi_2) | Fig. 1D                                    | 5'-CGGCGTTTCCGGGTTCATAGGCTCCGCC <sup>5m</sup> CGGACTCTGATGACCAGGGCATCACA-3'<br>3'-GCCGCAAAGGCCAAGGTATCCGAGGCGGG <sup>5m</sup> CCTGAGACTACTGGTCCCCTAGTGT-5'                                                                                                                                                                                                                                                                                                                                                                                                                                                |
| C <sup>5m</sup> CGG (ss_1)  | Fig. 1D                                    | 5'-CGGCGTTTCCGGGTTCATAGGCTCCGCC <sup>5m</sup> CGGACTCTGATGACCAGGGCATCACA-3'<br>3'-GCCGCAAAGGCCAAGGTATCCGAGGCGGG <sup>5m</sup> CCTGAGACTACTGGTCCCCTAGTGT-5'                                                                                                                                                                                                                                                                                                                                                                                                                                                |
| C <sup>5m</sup> CGG (ss_2)  | Fig. 1 D and E                             | 5'-CGGCGTTTCCGGGTTCATAGGCTCCGCC <sup>5m</sup> CGGACTCTGATGACCAGGGCATCACA-3'<br>3'-GCCGCAAAGGCCAAGGTATCCGAGGCGGGCCTGAGACTACTGGTCCCCTAGTGT-5'                                                                                                                                                                                                                                                                                                                                                                                                                                                               |
| C <sup>5m</sup> CGGG        | Fig. 3C                                    | 5'-CGGCGTTTCCGGGTTCATAGGCTCCGCC <sup>5m</sup> CGGACTCTGATGACCAGGGCATCACA-3'<br>3'-GCCGCAAAGGCCAAGGTATCCGAGGCGGGCCTGAGACTACTGGTCCCCTAGTGT-5'                                                                                                                                                                                                                                                                                                                                                                                                                                                               |
| C <sup>5m</sup> CAGG        | Fig. 3C                                    | 5'-CGGCGTTTCCGGGTTCATAGGCTCCGCC <sup>5m</sup> CAGGACTCTGATGACCAGGGCATCACA-3'<br>3'-GCCGCAAAGGCCAAGGTATCCGAGGCGGGTCTGAGACTACTGGTCCCCTAGTGT-5'                                                                                                                                                                                                                                                                                                                                                                                                                                                              |
| C <sup>5m</sup> CTGG        | Fig. 3C                                    | 5'-CGGCGTTTCCGGGTTCATAGGCTCCGCC <sup>5m</sup> CTGGACTCTGATGACCAGGGCATCACA-3'<br>3'-GCCGCAAAGGCCAAGGTATCCGAGGCGGGACCTGAGACTACTGGTCCCCTAGTGT-5'                                                                                                                                                                                                                                                                                                                                                                                                                                                             |
| C <sup>5m</sup> CCGG        | Fig. 3C                                    | 5'-CGGCGTTTCCGGGTTCATAGGCTCCGCC <sup>5m</sup> CCGGACTCTGATGACCAGGGCATCACA-3'<br>3'-GCCGCAAAGGCCAAGGTATCCGAGGCGGGCCTGAGACTACTGGTCCCCTAGTGT-5'                                                                                                                                                                                                                                                                                                                                                                                                                                                              |
| A <sup>5m</sup> CGGG        | Fig. 3C                                    | 5'-CGGCGTTTCCGGGTTCATAGGCTCCGCCA <sup>5m</sup> CGGACTCTGATGACCAGGGCATCACA-3'<br>3'-GCCGCAAAGGCCAAGGTATCCGAGGCGGTGCCCTGAGACTACTGGTCCCCTAGTGT-5'                                                                                                                                                                                                                                                                                                                                                                                                                                                            |
| T <sup>5m</sup> CGGG        | Fig. 3C                                    | 5'-CGGCGTTTCCGGGTTCATAGGCTCCGCCT <sup>5m</sup> CGGACTCTGATGACCAGGGCATCACA-3'<br>3'-GCCGCAAAGGCCAAGGTATCCGAGGCGGAGCCTGAGACTACTGGTCCCCTAGTGT-5'                                                                                                                                                                                                                                                                                                                                                                                                                                                             |
| G <sup>5m</sup> CGGG        | Fig. 3C                                    | 5'-CGGCGTTTCCGGGTTCATAGGCTCCGCCG <sup>5m</sup> CGGACTCTGATGACCAGGGCATCACA-3'<br>3'-GCCGCAAAGGCCAAGGTATCCGAGGCGGCCTGAGACTACTGGTCCCCTAGTGT-5'                                                                                                                                                                                                                                                                                                                                                                                                                                                               |
| ss_TA                       | Fig. 3D                                    | 5'-TATAATACCCTAGTAATAAGAGTACGGGGCGGAGCCTATAGAACC CGGAAACGCCG-3'                                                                                                                                                                                                                                                                                                                                                                                                                                                                                                                                           |
| ss_TG                       | Fig. 3D                                    | 5'-TGTGATGCCCTGGTATGAGAGTCCGGGCGGAGCCTGTGGAACCCGGAAACGCCG-3'                                                                                                                                                                                                                                                                                                                                                                                                                                                                                                                                              |
| ss_TC                       | Fig. 3D                                    | 5'-TCTCATCCCTCGTCATCAGAGTCCGGGCGGAGCCTCTCGAACC CGGAAACGCCG-3'                                                                                                                                                                                                                                                                                                                                                                                                                                                                                                                                             |
| C <sup>5m</sup> CAG(hemi)   | Fig. 3E                                    | 5'-CGGCGTTTCCGGGTTCATAGGCTCCGCC <sup>5m</sup> CAGACTCTGATGACCAGGGCATCACA-3'<br>3'-GCCGCAAAGGCCAAGGTATCCGAGGCGGGTCTGAGACTACTGGTCCCCTAGTGT-5'                                                                                                                                                                                                                                                                                                                                                                                                                                                               |
| C <sup>5m</sup> CTG(hemi)   | Fig. 3E                                    | 5'-CGGCGTTTCCGGGTTCATAGGCTCCGCC <sup>5m</sup> CTGACTCTGATGACCAGGGCATCACA-3'<br>3'-GCCGCAAAGGCCAAGGTATCCGAGGCGGGACTGAGACTACTGGTCCCCTAGTGT-5'                                                                                                                                                                                                                                                                                                                                                                                                                                                               |
| C <sup>5m</sup> CCG(hemi)   | Fig. 3E                                    | 5'-CGGCGTTTCCGGGTTCATAGGCTCCGCC <sup>5m</sup> CCGACTCTGATGACCAGGGCATCACA-3'<br>3'-GCCGCAAAGGCCAAGGTATCCGAGGCGGGGCTGAGACTACTGGTCCCCTAGTGT-5'                                                                                                                                                                                                                                                                                                                                                                                                                                                               |



**Table S3. Quantification of oxidation reaction species, as determined by LC-MS-based NgTET1 activity assay**

| Figure   | DNA substrate                        | Fraction of <sup>5m</sup> C | Fraction of <sup>5hm</sup> C | Fraction of <sup>5f</sup> C | Fraction of <sup>5ca</sup> C |
|----------|--------------------------------------|-----------------------------|------------------------------|-----------------------------|------------------------------|
| Fig. 1C  | Oligo (24X)                          | 0.014 ± 0.003               | 0.039 ± 0.013                | 0.037 ± 0.008               | 0.910 ± 0.013                |
|          | Plasmid (M.Hpall)                    | 0                           | 0.050 ± 0.015                | 0.080 ± 0.016               | 0.870 ± 0.008                |
| Fig. 1D  | Genomic (IMR90)                      | 0.003 ± 0.001               | 0.035 ± 0.012                | 0.088 ± 0.013               | 0.874 ± 0.024                |
|          | symmDNA (C <sup>5m</sup> CGG)        | 0.015 ± 0.001               | 0.070 ± 0.007                | 0.166 ± 0.018               | 0.748 ± 0.020                |
|          | hemiDNA (C <sup>5m</sup> CGG hemi_1) | 0.015 ± 0.006               | 0.060 ± 0.001                | 0.059 ± 0.013               | 0.866 ± 0.011                |
|          | hemiDNA (C <sup>5m</sup> CGG hemi_2) | 0.012 ± 0.002               | 0.069 ± 0.011                | 0.039 ± 0.008               | 0.881 ± 0.019                |
|          | ssDNA (C <sup>5m</sup> CGG ss_1)     | 0.004 ± 0.003               | 0.026 ± 0.005                | 0.024 ± 0.005               | 0.945 ± 0.011                |
|          | ssDNA (C <sup>5m</sup> CGG ss_2)     | 0.021 ± 0.006               | 0.045 ± 0.014                | 0.031 ± 0.007               | 0.903 ± 0.020                |
| Fig. 1E  | HeLa + TET1                          | 0.003 ± 0.003               | 0.020 ± 0.013                | 0.052 ± 0.044               | 0.926 ± 0.054                |
|          | HeLa + NgTET1                        | 0.023 ± 0.008               | 0.014 ± 0.001                | 0.052 ± 0.002               | 0.910 ± 0.008                |
|          | C <sup>5m</sup> CGG + TET1           | 0.015 ± 0.009               | 0.229 ± 0.016                | 0.126 ± 0.030               | 0.630 ± 0.030                |
|          | C <sup>5m</sup> CGG + NgTET1         | 0.008 ± 0.001               | 0.043 ± 0.005                | 0.133 ± 0.007               | 0.815 ± 0.011                |
|          | C <sup>5m</sup> CGG (ss_2) + TET1    | 0.022                       | 0.036                        | 0.049                       | 0.893                        |
|          | C <sup>5m</sup> CGG (ss_2) + NgTET1  | 0.004 ± 0.001               | 0.007 ± 0.001                | 0.009 ± 0.002               | 0.980 ± 0.002                |
|          | M.Fnu4HI + TET1                      | 0.049 ± 0.018               | 0.255 ± 0.047                | 0.232 ± 0.015               | 0.463 ± 0.053                |
|          | M.Fnu4HI + NgTET1                    | 0.083 ± 0.004               | 0.207 ± 0.006                | 0.215 ± 0.002               | 0.495 ± 0.009                |
| Fig. 3A  | 5-Aza-dC Jurkat                      | 0.007 ± 0.004               | 0.035 ± 0.019                | 0.060 ± 0.014               | 0.897 ± 0.021                |
|          | Jurkat                               | 0.002 ± 0.002               | 0.026 ± 0.004                | 0.066 ± 0.010               | 0.904 ± 0.010                |
|          | CpG Jurkat                           | 0.001 ± 0.001               | 0.015 ± 0.004                | 0.040 ± 0.004               | 0.943 ± 0.003                |
|          | HeLa                                 | 0.003 ± 0.002               | 0.027 ± 0.003                | 0.066 ± 0.010               | 0.904 ± 0.010                |
|          | CpG HeLa                             | 0.004 ± 0.002               | 0.014 ± 0.001                | 0.072 ± 0.018               | 0.910 ± 0.015                |
|          | NIH 3T3 mouse                        | 0.003 ± 0.002               | 0.018 ± 0.004                | 0.062 ± 0.014               | 0.917 ± 0.012                |
|          | CpG NIH 3T3 mouse                    | 0.004 ± 0.002               | 0.015 ± 0.003                | 0.086 ± 0.020               | 0.895 ± 0.017                |
|          | MG1655                               | 0.147 ± 0.021               | 0.487 ± 0.026                | 0.073 ± 0.008               | 0.294 ± 0.009                |
|          | M.Alul                               | 0.136 ± 0.004               | 0.615 ± 0.057                | 0.208 ± 0.088               | 0.042 ± 0.042                |
|          | M2.Hgal                              | 0.014 ± 0.008               | 0.070 ± 0.041                | 0.062 ± 0.016               | 0.854 ± 0.057                |
|          | H.pylori                             | 0.053 ± 0.017               | 0.151 ± 0.036                | 0.281 ± 0.004               | 0.515 ± 0.048                |
|          | Fig. 3B                              | M.Hpall                     | 0.001 ± 0.001                | 0.044 ± 0.014               | 0.084 ± 0.013                |
| pUC19    |                                      | 0.071 ± 0.010               | 0.285 ± 0.025                | 0.151 ± 0.028               | 0.493 ± 0.019                |
| M.HaeIII |                                      | 0.043 ± 0.004               | 0.390 ± 0.005                | 0.320 ± 0.087               | 0.247 ± 0.093                |
| Fig. 3C  | M.MspI                               | 0.061 ± 0.007               | 0.408 ± 0.058                | 0.230 ± 0.060               | 0.302 ± 0.086                |
|          | C <sup>5m</sup> CGGG                 | 0.015 ± 0.001               | 0.055 ± 0.004                | 0.214 ± 0.006               | 0.715 ± 0.008                |
|          | A <sup>5m</sup> CGGG                 | 0.011 ± 0.002               | 0.014 ± 0.001                | 0.009 ± 0.001               | 0.967 ± 0.002                |
|          | G <sup>5m</sup> CGGG                 | 0.008 ± 0.001               | 0.061 ± 0.021                | 0.215 ± 0.027               | 0.716 ± 0.048                |
|          | T <sup>5m</sup> CGGG                 | 0.011 ± 0.001               | 0.020 ± 0.001                | 0.015 ± 0.002               | 0.954 ± 0.002                |
|          | C <sup>5m</sup> CAGG                 | 0.009 ± 0.001               | 0.396 ± 0.014                | 0.419 ± 0.013               | 0.176 ± 0.012                |
|          | C <sup>5m</sup> CTGG                 | 0.080 ± 0.056               | 0.463 ± 0.017                | 0.305 ± 0.038               | 0.151 ± 0.019                |
|          | C <sup>5m</sup> CCGG                 | 0.285 ± 0.128               | 0.522 ± 0.102                | 0.144 ± 0.022               | 0.048 ± 0.005                |

**Table S4. <sup>5m</sup>C methylation motifs detected for *H. pylori* 26695 using NgTET1/NaBH<sub>4</sub>/T4-βGT and SMRT sequencing**

| Methyltransferase* | <sup>5m</sup> C motif (5'-3') | Total number in genome | No. methylated | % Detected methylated |
|--------------------|-------------------------------|------------------------|----------------|-----------------------|
| M2.HpyAVI          | <sup>5m</sup> CCTC            | 4,885                  | 4,349          | 89.0                  |
| M.HpyAV            | C <sup>5m</sup> CTTC          | 1,304                  | 1,278          | 98.0                  |
| M.HpyAVIII         | G <sup>5m</sup> CGC           | 12,538                 | 7,188          | 57.3                  |

\*Methyltransferase assignments are as previously described (1).

1. Krebs J, et al. (2014) The complex methylome of the human gastric pathogen *Helicobacter pylori*. *Nucleic Acids Res* 42(4):2415–2432.
